# Supplementary material
Source: MDPI journal article supplement (https://www.mdpi.com/1999-4907/10/5/396)
Supplement: s1 [file s1]

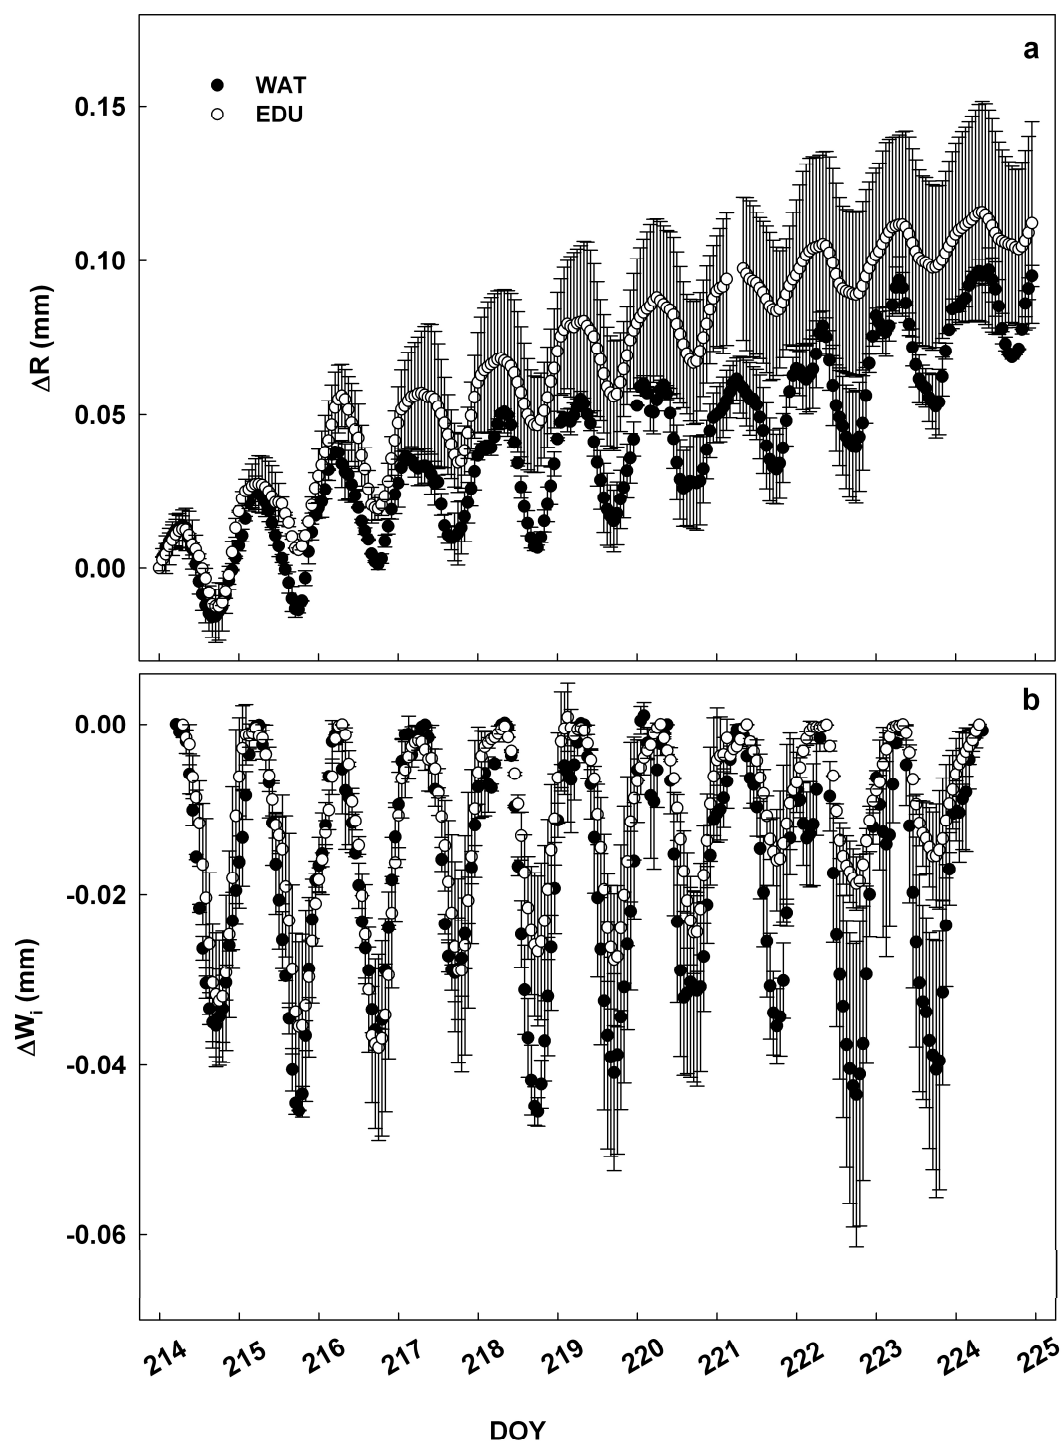

Figure 1 supplementary. Time series of hourly stem radius variation (a,  $\Delta R \pm SD$ ) and instantaneous stem water deficit (b,  $\Delta W_i \pm SD$ ) during ten days of high evaporative demand and  $M24 > 40$  ppb in WAT and EDU trees ( $N=5$  trees). Data of stem radius were set to 0 before the analyses.  $\Delta W_i$  was extracted by de-trending the daily time series of  $\Delta R$  using a piecewise linear regression.
